# Supplementary material for: Adiponectin Gene Polymorphisms: A Case–Control Study on Their Role in Late-Onset Alzheimer’s Disease Risk
Source: MDPI journal article supplement (doi:10.3390/life14030346), 2024-03-07
Supplement: s1 [file s1]

**Supplementary Table S2.** Demographic and clinical characteristics of LOAD patients included in the analysis of association between *ADIPOQ* SNPs and plasma adiponectin levels.

| Parameter                  | LOAD<br>(n = 156)        |
|----------------------------|--------------------------|
| Age at examination (years) | 79.01 ± 5.77             |
| Age of onset (years)       | 75.72 ± 6.13             |
| Sex (female/male)          | 104 (66.67%)/52 (33.33%) |
| MoCA score                 | 16.83 ± 5.37             |
| BMI (kg/m <sup>2</sup> )   | 26.94 ± 4.68             |
| Hypertension (yes/no)      | 115 (73.72%)/41 (26.28%) |
| T2DM                       | 38 (24.36%)/118 (75.64%) |
| AChEI treatment            | 87 (55.77%)/69 (44.23%)  |
| <i>APOE</i> ε4 positivity  | 80 (51.28%)/76 (48.72%)  |

Data are expressed as mean ± standard deviation or as absolute values with percentages in parentheses. AChEI: acetylcholinesterase inhibitor; *ADIPOQ*: adiponectin gene; *APOE*: apolipoprotein E gene; BMI: body mass index; LOAD: late-onset Alzheimer's disease; MoCA: Montreal Cognitive Assessment; T2DM: type 2 diabetes mellitus.
