# Supplementary material for: Adiponectin Gene Polymorphisms: A Case–Control Study on Their Role in Late-Onset Alzheimer’s Disease Risk
Source: MDPI journal article supplement (doi:10.3390/life14030346), 2024-03-07
Supplement: s1 [file s1]

**Supplementary Table S7.** Association between *ADIPOQ* polymorphisms and LOAD risk in the *APOE*  $\epsilon$ 4-negative subpopulation.

| <i>ADIPOQ</i> SNPs | <i>APOE</i> $\epsilon$ 4- LOAD<br>(n = 190) |        | <i>APOE</i> $\epsilon$ 4- Controls<br>(n = 432) |        | Logistic Regression Analysis<br>(Log-additive Model) |                  |
|--------------------|---------------------------------------------|--------|-------------------------------------------------|--------|------------------------------------------------------|------------------|
|                    | Genotypes <sup>a</sup>                      | MAF    | Genotypes <sup>a</sup>                          | MAF    | <i>p</i> -Value                                      | OR (95% CI)      |
| rs822387 T>C       | 169/21/0                                    | 0.0553 | 377/51/4                                        | 0.0683 | 0.46                                                 | 0.83 (0.50–1.38) |
| rs860291 C>T       | 150/38/2                                    | 0.1105 | 341/89/2                                        | 0.1076 | 0.90                                                 | 0.97 (0.65–1.46) |
| rs17300539 G>A     | 167/23/0                                    | 0.0605 | 373/55/4                                        | 0.0729 | 0.60                                                 | 0.88 (0.53–1.44) |
| rs266729 C>G       | 108/64/18                                   | 0.2632 | 229/168/35                                      | 0.2755 | 0.65                                                 | 0.94 (0.72–1.23) |
| rs182052 G>A       | 79/80/31                                    | 0.3737 | 174/203/55                                      | 0.3623 | 0.71                                                 | 1.05 (0.82–1.35) |
| rs822393 C>T       | 101/72/17                                   | 0.2789 | 237/169/26                                      | 0.2558 | 0.39                                                 | 1.13 (0.86–1.49) |
| rs822395 A>C       | 91/80/19                                    | 0.3105 | 193/189/50                                      | 0.3345 | 0.37                                                 | 0.89 (0.68–1.15) |
| rs822396 A>G       | 133/51/6                                    | 0.1658 | 290/131/11                                      | 0.1771 | 0.46                                                 | 0.88 (0.63–1.23) |
| rs7627128 C>A      | 134/50/6                                    | 0.1632 | 292/127/13                                      | 0.1771 | 0.51                                                 | 0.90 (0.65–1.24) |
| rs2036373 T>G      | 166/24/0                                    | 0.0632 | 383/48/1                                        | 0.0579 | 0.56                                                 | 1.17 (0.70–1.97) |
| rs17366568 G>A     | 151/37/2                                    | 0.1079 | 320/108/4                                       | 0.1343 | 0.16                                                 | 0.76 (0.51–1.12) |
| rs17846866 T>G     | 162/28/0                                    | 0.0737 | 373/57/2                                        | 0.0706 | 0.89                                                 | 1.04 (0.64–1.68) |
| rs2241766 T>G      | 149/39/2                                    | 0.1132 | 343/84/5                                        | 0.1088 | 0.92                                                 | 1.02 (0.69–1.51) |
| rs1501299 G>T      | 84/87/19                                    | 0.3289 | 218/177/37                                      | 0.2905 | 0.098                                                | 1.25 (0.96–1.63) |
| rs2241767 A>G      | 150/39/1                                    | 0.1079 | 346/81/5                                        | 0.1053 | 0.96                                                 | 1.01 (0.68–1.51) |
| rs3821799 C>T      | 50/95/45                                    | 0.4868 | 131/210/91                                      | 0.4537 | 0.19                                                 | 1.18 (0.92–1.50) |
| rs3774261 G>A      | 59/96/35                                    | 0.4368 | 161/200/71                                      | 0.3958 | 0.12                                                 | 1.22 (0.95–1.56) |
| rs1063539 G>C      | 147/41/2                                    | 0.1184 | 341/86/5                                        | 0.1111 | 0.83                                                 | 1.04 (0.71–1.54) |

<sup>a</sup>Genotype counts are presented as follows: major allele homozygotes/heterozygotes/minor allele homozygotes. Logistic regression analysis was adjusted for age, sex, hypertension, type 2 diabetes mellitus, and body mass index. *ADIPOQ*: adiponectin gene; *APOE*: apolipoprotein E gene; CI: confidence interval; LOAD: late-onset Alzheimer's disease; MAF: minor allele frequency; OR: odds ratio; SNP: single nucleotide polymorphism.
