# Supplementary material for: Adiponectin Gene Polymorphisms: A Case–Control Study on Their Role in Late-Onset Alzheimer’s Disease Risk
Source: MDPI journal article supplement (doi:10.3390/life14030346), 2024-03-07
Supplement: s1 [file s1]

**Supplementary Table S11.** Plasma adiponectin levels in different subgroups of patients with LOAD.

| Patient Group                             | Adiponectin Levels (µg/ml) | <i>p</i> -Value |
|-------------------------------------------|----------------------------|-----------------|
| Total LOAD patient population (n = 156)   | 10.39 ± 5.41               | -               |
| Female patients (n = 104)                 | 11.46 ± 5.81               | <0.0001         |
| Male patients (n = 52)                    | 8.27 ± 3.71                |                 |
| Patients with <i>APOE</i> ε4 (n = 80)     | 9.82 ± 4.70                | 0.18            |
| Patients without <i>APOE</i> ε4 (n = 76)  | 10.99 ± 6.04               |                 |
| Patients with hypertension (n = 115)      | 10.62 ± 5.61               | 0.34            |
| Patients without hypertension (n = 41)    | 9.74 ± 4.81                |                 |
| Patients with T2DM (n = 38)               | 10.17 ± 6.20               | 0.80            |
| Patients without T2DM (n = 118)           | 10.46 ± 5.16               |                 |
| Patients with AChEI treatment (n = 87)    | 10.55 ± 5.64               | 0.67            |
| Patients without AChEI treatment (n = 69) | 10.18 ± 5.14               |                 |

Adiponectin levels are expressed as mean ± standard deviation. Differences between the LOAD subgroups were analyzed by the unpaired t test with Welch correction. AChEI: acetylcholinesterase inhibitor; *ADIPOQ*: adiponectin gene; *APOE*: apolipoprotein E gene; LOAD: late-onset Alzheimer's disease; T2DM: type 2 diabetes mellitus.
