# Supplementary material for: Adiponectin Gene Polymorphisms: A Case–Control Study on Their Role in Late-Onset Alzheimer’s Disease Risk
Source: MDPI journal article supplement (doi:10.3390/life14030346), 2024-03-07
Supplement: s1 [file s1]

**Supplementary Table S4.** Hardy-Weinberg equilibrium values in patient and control populations.

| <i>ADIPOQ</i> SNPs | Controls<br>HWE $p$ / $\chi^2$ Values | LOAD Patients<br>HWE $p$ / $\chi^2$ Values |
|--------------------|---------------------------------------|--------------------------------------------|
| rs822387           | 0.12 / 2.45                           | 0.31 / 1.01                                |
| rs860291           | 0.20 / 1.66                           | 0.60 / 0.27                                |
| rs17300539         | 0.086 / 3.01                          | 0.57 / 0.32                                |
| rs266729           | 0.73 / 0.12                           | 0.43 / 0.63                                |
| rs182052           | 0.66 / 0.19                           | 0.48 / 0.49                                |
| rs822393           | 0.66 / 0.20                           | 0.14 / 2.22                                |
| rs822395           | 0.41 / 0.67                           | 0.48 / 0.49                                |
| rs822396           | 0.74 / 0.11                           | 0.81 / 0.06                                |
| rs7627128          | 0.86 / 0.03                           | 0.91 / 0.01                                |
| rs2036373          | 0.60 / 0.27                           | 0.26 / 1.28                                |
| rs17366568         | 0.14 / 2.16                           | 0.64 / 0.22                                |
| rs17846866         | 0.80 / 0.06                           | 0.12 / 2.37                                |
| rs2241766          | 0.96 / 0.003                          | 0.72 / 0.13                                |
| rs1501299          | 0.58 / 0.30                           | 0.65 / 0.20                                |
| rs2241767          | 0.84 / 0.04                           | 0.22 / 1.50                                |
| rs3821799          | 0.26 / 1.25                           | 0.97 / 0.001                               |
| rs3774261          | 0.26 / 1.29                           | 0.97 / 0.001                               |
| rs1063539          | 0.89 / 0.02                           | 0.35 / 0.86                                |

*ADIPOQ*: adiponectin gene; HWE: Hardy-Weinberg equilibrium; LOAD: late-onset Alzheimer's disease; SNP: single nucleotide polymorphism.
