# Supplementary material for: Adiponectin Gene Polymorphisms: A Case–Control Study on Their Role in Late-Onset Alzheimer’s Disease Risk
Source: MDPI journal article supplement (doi:10.3390/life14030346), 2024-03-07
Supplement: s1 [file s1]

**Supplementary Table S5.** Association between *ADIPOQ* SNPs and LOAD risk in the whole study population.

| Allele / Genotype | LOAD<br>(n = 385) | Controls<br>(n = 533) | Genetic Model                  | <i>p</i> -Value | Crude Analysis<br>OR (95% CI) | Logistic Regression Analysis <sup>a</sup><br><i>p</i> -Value | OR (95% CI)      |
|-------------------|-------------------|-----------------------|--------------------------------|-----------------|-------------------------------|--------------------------------------------------------------|------------------|
| <b>rs822387</b>   |                   |                       | Allele contrast (C vs. T)      | 0.81            | 0.96 (0.66–1.38)              | 0.81                                                         | 0.96 (0.66–1.38) |
| T                 | 718 (93.25%)      | 991 (92.96%)          | Codominant (TC vs. TT)         | 0.96            | 0.98 (0.65–1.46)              | 0.83                                                         | 0.95 (0.62–1.47) |
| C                 | 52 (6.75%)        | 75 (7.04%)            | Codominant (CC vs. TT)         |                 | 0.83 (0.20–3.48)              |                                                              | 0.64 (0.13–3.02) |
| TT                | 336 (87.27%)      | 463 (86.87%)          | Dominant (TC + CC vs. TT)      | 0.86            | 0.96 (0.65–1.43)              | 0.72                                                         | 0.93 (0.61–1.41) |
| TC                | 46 (11.95%)       | 65 (12.20%)           | Recessive (CC vs. TT + TC)     | 0.80            | 0.83 (0.20–3.49)              | 0.57                                                         | 0.64 (0.14–3.03) |
| CC                | 3 (0.78%)         | 5 (0.94%)             | Over-dominant (TC vs. TT + CC) | 0.91            | 0.98 (0.65–1.46)              | 0.84                                                         | 0.96 (0.62–1.47) |
|                   |                   |                       | Log-additive                   | 0.82            | 0.96 (0.67–1.37)              | 0.64                                                         | 0.91 (0.62–1.34) |
| <b>rs860291</b>   |                   |                       | Allele contrast (T vs. C)      | 0.49            | 1.11 (0.82–1.49)              | 0.49                                                         | 1.11 (0.82–1.49) |
| C                 | 682 (88.57%)      | 955 (89.59%)          | Codominant (CT vs. CC)         | 0.65            | 1.08 (0.78–1.49)              | 0.73                                                         | 1.07 (0.76–1.52) |
| T                 | 88 (11.43%)       | 111 (10.41%)          | Codominant (TT vs. CC)         |                 | 1.88 (0.42–8.47)              |                                                              | 1.78 (0.35–9.10) |
| CC                | 301 (78.18%)      | 425 (79.74%)          | Dominant (CT + TT vs. CC)      | 0.57            | 1.10 (0.80–1.51)              | 0.62                                                         | 1.09 (0.77–1.54) |
| CT                | 80 (20.78%)       | 105 (19.70%)          | Recessive (TT vs. CC + CT)     | 0.42            | 1.85 (0.41–8.34)              | 0.50                                                         | 1.76 (0.34–8.94) |
| TT                | 4 (1.04%)         | 3 (0.56%)             | Over-dominant (CT vs. CC + TT) | 0.69            | 1.07 (0.77–1.48)              | 0.72                                                         | 1.07 (0.75–1.51) |
|                   |                   |                       | Log-additive                   | 0.48            | 1.12 (0.82–1.51)              | 0.54                                                         | 1.11 (0.80–1.53) |
| <b>rs17300539</b> |                   |                       | Allele contrast (A vs. G)      | 0.38            | 0.85 (0.59–1.22)              | 0.38                                                         | 0.85 (0.59–1.22) |
| G                 | 719 (93.38%)      | 984 (92.31%)          | Codominant (GA vs. GG)         | 0.27            | 0.95 (0.65–1.41)              | 0.18                                                         | 0.94 (0.62–1.44) |
| A                 | 51 (6.62%)        | 82 (7.69%)            | Codominant (AA vs. GG)         |                 | 0.23 (0.03–1.90)              |                                                              | 0.17 (0.02–1.53) |
| GG                | 335 (87.01%)      | 457 (85.74%)          | Dominant (GA + AA vs. GG)      | 0.58            | 0.90 (0.61–1.32)              | 0.52                                                         | 0.87 (0.58–1.32) |
| GA                | 49 (12.73%)       | 70 (13.13%)           | Recessive (AA vs. GG + GA)     | 0.11            | 0.23 (0.03–1.91)              | 0.069                                                        | 0.17 (0.02–1.55) |
| AA                | 1 (0.26%)         | 6 (1.13%)             | Over-dominant (GA vs. GG + AA) | 0.86            | 0.96 (0.65–1.43)              | 0.83                                                         | 0.95 (0.62–1.46) |
|                   |                   |                       | Log-additive                   | 0.39            | 0.86 (0.60–1.22)              | 0.32                                                         | 0.82 (0.56–1.21) |
| <b>rs266729</b>   |                   |                       | Allele contrast (G vs. C)      | 0.83            | 0.98 (0.79–1.20)              | 0.83                                                         | 0.98 (0.79–1.20) |
| C                 | 559 (72.60%)      | 769 (72.14%)          | Codominant (CG vs. CC)         | 0.91            | 0.94 (0.72–1.24)              | 0.71                                                         | 0.89 (0.66–1.19) |
| G                 | 211 (27.40%)      | 297 (27.86%)          | Codominant (GG vs. CC)         |                 | 1.01 (0.62–1.65)              |                                                              | 1.00 (0.59–1.69) |
| CC                | 206 (53.51%)      | 279 (52.34%)          | Dominant (CG + GG vs. CC)      | 0.73            | 0.95 (0.73–1.24)              | 0.49                                                         | 0.91 (0.68–1.20) |
| CG                | 147 (38.18%)      | 211 (39.59%)          | Recessive (GG vs. CC + CG)     | 0.89            | 1.03 (0.64–1.67)              | 0.84                                                         | 1.05 (0.64–1.75) |
| GG                | 32 (8.31%)        | 43 (8.07%)            | Over-dominant (CG vs. CC + GG) | 0.67            | 0.94 (0.72–1.23)              | 0.41                                                         | 0.89 (0.66–1.18) |
|                   |                   |                       | Log-additive                   | 0.83            | 0.98 (0.80–1.20)              | 0.66                                                         | 0.95 (0.76–1.18) |
| <b>rs182052</b>   |                   |                       | Allele contrast (A vs. G)      | 0.52            | 1.06 (0.88–1.29)              | 0.52                                                         | 1.06 (0.88–1.29) |
| G                 | 477 (61.95%)      | 676 (63.41%)          | Codominant (GA vs. GG)         | 0.58            | 0.97 (0.73–1.30)              | 0.63                                                         | 0.94 (0.69–1.27) |
| A                 | 293 (38.05%)      | 390 (36.59%)          | Codominant (AA vs. GG)         |                 | 1.20 (0.80–1.80)              |                                                              | 1.15 (0.75–1.77) |
| GG                | 151 (39.22%)      | 212 (39.77%)          | Dominant (GA + AA vs. GG)      | 0.87            | 1.02 (0.78–1.34)              | 0.91                                                         | 0.98 (0.74–1.31) |
| GA                | 175 (45.46%)      | 252 (47.28%)          | Recessive (AA vs. GG + GA)     | 0.31            | 1.22 (0.84–1.77)              | 0.39                                                         | 1.19 (0.80–1.78) |
| AA                | 59 (15.32%)       | 69 (12.95%)           | Over-dominant (GA vs. GG + AA) | 0.58            | 0.93 (0.71–1.21)              | 0.48                                                         | 0.90 (0.68–1.20) |

|                   |              |                |                                |                           |                   |                  |                  |                  |
|-------------------|--------------|----------------|--------------------------------|---------------------------|-------------------|------------------|------------------|------------------|
|                   |              |                |                                | Log-additive              | 0.52              | 1.06 (0.88–1.29) | 0.72             | 1.04 (0.85–1.27) |
| <b>rs822393</b>   |              |                |                                | Allele contrast (T vs. C) | 0.50              | 1.07 (0.87–1.33) | 0.50             | 1.07 (0.87–1.33) |
| C                 | 565 (73.38%) | 797 (74.77%)   | Codominant (CT vs. CC)         | 0.30                      | 0.94 (0.71–1.24)  | 0.35             | 0.99 (0.74–1.34) |                  |
| T                 | 205 (26.62%) | 269 (25.23%)   | Codominant (TT vs. CC)         |                           | 1.43 (0.85–2.40)  |                  | 1.48 (0.85–2.57) |                  |
| CC                | 213 (55.33%) | 296 (55.53%)   | Dominant (CT + TT vs. CC)      | 0.95                      | 1.01 (0.77–1.31)  | 0.68             | 1.06 (0.80–1.41) |                  |
| CT                | 139 (36.10%) | 205 (38.46%)   | Recessive (TT vs. CC + CT)     | 0.14                      | 1.47 (0.89–2.43)  | 0.15             | 1.49 (0.87–2.55) |                  |
| TT                | 33 (8.57%)   | 32 (6.00%)     | Over-dominant (CT vs. CC + TT) | 0.47                      | 0.90 (0.69–1.19)  | 0.72             | 0.95 (0.71–1.27) |                  |
|                   |              |                |                                | Log-additive              | 0.51              | 1.07 (0.87–1.32) | 0.36             | 1.11 (0.89–1.39) |
| <b>rs822395</b>   |              |                |                                | Allele contrast (C vs. A) | 0.77              | 1.03 (0.85–1.25) | 0.77             | 1.03 (0.85–1.25) |
| A                 | 507 (65.84%) | 709 (66.51%)   | Codominant (AC vs. AA)         | 0.96                      | 1.03 (0.78–1.36)  | 0.97             | 1.00 (0.74–1.35) |                  |
| C                 | 263 (34.16%) | 357 (33.49%)   | Codominant (CC vs. AA)         |                           | 1.06 (0.69–1.62)  |                  | 0.95 (0.60–1.50) |                  |
| AA                | 170 (44.15%) | 240 (45.03%)   | Dominant (AC + CC vs. AA)      | 0.79                      | 1.04 (0.80–1.35)  | 0.93             | 0.99 (0.74–1.31) |                  |
| AC                | 167 (43.38%) | 229 (42.96%)   | Recessive (CC vs. AA + AC)     | 0.83                      | 1.04 (0.70–1.56)  | 0.81             | 0.95 (0.62–1.46) |                  |
| CC                | 48 (12.47%)  | 64 (12.01%)    | Over-dominant (AC vs. AA + CC) | 0.90                      | 1.02 (0.78–1.33)  | 0.95             | 1.01 (0.76–1.34) |                  |
|                   |              |                |                                | Log-additive              | 0.77              | 1.03 (0.85–1.25) | 0.86             | 0.98 (0.80–1.21) |
| <b>rs822396</b>   |              |                |                                | Allele contrast (G vs. A) | 0.72              | 1.04 (0.82–1.33) | 0.72             | 1.04 (0.82–1.33) |
| A                 | 627 (81.43%) | 875 (82.08%)   | Codominant (AG vs. AA)         | 0.87                      | 1.01 (0.76–1.35)  | 0.86             | 0.93 (0.68–1.27) |                  |
| G                 | 143 (18.57%) | 191 (17.92%)   | Codominant (GG vs. AA)         |                           | 1.22 (0.59–2.55)  |                  | 1.09 (0.49–2.42) |                  |
| AA                | 256 (66.49%) | 358 (67.17%)   | Dominant (AG + GG vs. AA)      | 0.83                      | 1.03 (0.78–1.36)  | 0.70             | 0.94 (0.70–1.27) |                  |
| AG                | 115 (29.87%) | 159 (29.83%)   | Recessive (GG vs. AA + AG)     | 0.60                      | 1.22 (0.59–2.53)  | 0.79             | 1.11 (0.50–2.46) |                  |
| GG                | 14 (3.64%)   | 16 (3.00%)     | Over-dominant (AG vs. AA + GG) | 0.99                      | 1.00 (0.75–1.33)  | 0.61             | 0.92 (0.68–1.26) |                  |
|                   |              |                |                                | Log-additive              | 0.72              | 1.04 (0.82–1.33) | 0.80             | 0.97 (0.75–1.25) |
| <b>rs7627128</b>  |              |                |                                | Allele contrast (A vs. C) | 0.51              | 0.92 (0.72–1.18) | 0.51             | 0.92 (0.72–1.18) |
| C                 | 644 (83.64%) | 879 (82.46%)   | Codominant (CA vs. CC)         | 0.79                      | 0.93 (0.70–1.25)  | 0.83             | 0.95 (0.70–1.31) |                  |
| A                 | 126 (16.36%) | 187 (17.54%)   | Codominant (AA vs. CC)         |                           | 0.79 (0.36–1.76)  |                  | 0.79 (0.34–1.83) |                  |
| CC                | 269 (69.87%) | 363 (68.10%)   | Dominant (CA + AA vs. CC)      | 0.57                      | 0.92 (0.69–1.22)  | 0.68             | 0.94 (0.69–1.27) |                  |
| CA                | 106 (27.53%) | 153 (28.71%)   | Recessive (AA vs. CC + CA)     | 0.60                      | 0.81 (0.37–1.79)  | 0.60             | 0.80 (0.35–1.85) |                  |
| AA                | 10 (2.60%)   | 17 (3.19%)     | Over-dominant (CA vs. CC + AA) | 0.70                      | 0.94 (0.70–1.26)  | 0.82             | 0.96 (0.70–1.32) |                  |
|                   |              |                |                                | Log-additive              | 0.51              | 0.92 (0.72–1.18) | 0.59             | 0.93 (0.71–1.21) |
| <b>rs2036373</b>  |              |                |                                | Allele contrast (G vs. T) | 0.94              | 0.98 (0.65–1.48) | 0.94             | 0.98 (0.65–1.48) |
| T                 | 728 (94.55%) | 1,007 (94.47%) | Codominant (TG vs. TT)         | 0.58                      | 1.02 (0.67–1.56)  | 0.49             | 1.17 (0.74–1.84) |                  |
| G                 | 42 (5.45%)   | 59 (5.53%)     | Codominant (GG vs. TT)         |                           | 0.46 (0.02–11.37) |                  | NA               |                  |
| TT                | 343 (89.09%) | 475 (89.12%)   | Dominant (TG + GG vs. TT)      | 0.99                      | 1.00 (0.66–1.53)  | 0.56             | 1.15 (0.73–1.80) |                  |
| TG                | 42 (10.91%)  | 57 (10.69%)    | Recessive (GG vs. TT + TG)     | 0.30                      | 0.46 (0.02–11.34) | 0.33             | NA               |                  |
| GG                | 0 (0.00%)    | 1 (0.19%)      | Over-dominant (TG vs. TT + GG) | 0.92                      | 1.02 (0.67–1.56)  | 0.50             | 1.17 (0.74–1.85) |                  |
|                   |              |                |                                | Log-additive              | 0.94              | 0.98 (0.65–1.49) | 0.62             | 1.12 (0.72–1.75) |
| <b>rs17366568</b> |              |                |                                | Allele contrast (A vs. G) | 0.32              | 0.86 (0.65–1.15) | 0.32             | 0.86 (0.65–1.15) |
| G                 | 683 (88.70%) | 929 (87.15%)   | Codominant (GA vs. GG)         | 0.49                      | 0.83 (0.60–1.14)  | 0.72             | 0.87 (0.62–1.22) |                  |

|                   |              |              |                                |      |                  |       |                  |
|-------------------|--------------|--------------|--------------------------------|------|------------------|-------|------------------|
| A                 | 87 (11.30%)  | 137 (12.85%) | Codominant (AA vs. GG)         |      | 1.06 (0.28–3.99) |       | 1.02 (0.24–4.26) |
| GG                | 302 (78.44%) | 401 (75.23%) | Dominant (GA + AA vs. GG)      | 0.26 | 0.83 (0.61–1.14) | 0.43  | 0.87 (0.63–1.22) |
| GA                | 79 (20.52%)  | 127 (23.83%) | Recessive (AA vs. GG + GA)     | 0.88 | 1.11 (0.30–4.16) | 0.95  | 1.05 (0.25–4.39) |
| AA                | 4 (1.04%)    | 5 (0.94%)    | Over-dominant (GA vs. GG + AA) | 0.23 | 0.83 (0.60–1.13) | 0.42  | 0.87 (0.62–1.22) |
|                   |              |              | Log-additive                   | 0.30 | 0.86 (0.64–1.15) | 0.47  | 0.89 (0.65–1.22) |
| <b>rs17846866</b> |              |              | Allele contrast (G vs. T)      | 0.61 | 1.10 (0.76–1.58) | 0.61  | 1.10 (0.76–1.58) |
| T                 | 714 (92.73%) | 995 (93.34%) | Codominant (TG vs. TT)         | 0.24 | 1.18 (0.80–1.73) | 0.25  | 1.23 (0.82–1.87) |
| G                 | 56 (7.27%)   | 71 (6.66%)   | Codominant (GG vs. TT)         |      | 0.28 (0.01–5.90) |       | NA               |
| TT                | 329 (85.45%) | 464 (87.05%) | Dominant (TG + GG vs. TT)      | 0.49 | 1.14 (0.78–1.67) | 0.39  | 1.20 (0.80–1.81) |
| TG                | 56 (14.55%)  | 67 (12.57%)  | Recessive (GG vs. TT + TG)     | 0.14 | 0.27 (0.01–5.76) | 0.18  | NA               |
| GG                | 0 (0.00%)    | 2 (0.38%)    | Over-dominant (TG vs. TT + GG) | 0.39 | 1.18 (0.81–1.73) | 0.31  | 1.24 (0.82–1.87) |
|                   |              |              | Log-additive                   | 0.60 | 1.10 (0.76–1.60) | 0.48  | 1.15 (0.77–1.72) |
| <b>rs2241766</b>  |              |              | Allele contrast (G vs. T)      | 0.72 | 1.06 (0.78–1.43) | 0.72  | 1.06 (0.78–1.43) |
| T                 | 685 (88.96%) | 954 (89.49%) | Codominant (TG vs. TT)         | 0.89 | 1.08 (0.78–1.51) | 0.88  | 1.10 (0.77–1.56) |
| G                 | 85 (11.04%)  | 112 (10.51%) | Codominant (GG vs. TT)         |      | 0.94 (0.26–3.35) |       | 1.00 (0.25–3.92) |
| TT                | 304 (78.96%) | 427 (80.11%) | Dominant (TG + GG vs. TT)      | 0.67 | 1.07 (0.78–1.48) | 0.63  | 1.09 (0.77–1.54) |
| TG                | 77 (20.00%)  | 100 (18.76%) | Recessive (GG vs. TT + TG)     | 0.90 | 0.92 (0.26–3.29) | 0.98  | 0.98 (0.25–3.85) |
| GG                | 4 (1.04%)    | 6 (1.13%)    | Over-dominant (TG vs. TT + GG) | 0.64 | 1.08 (0.78–1.51) | 0.61  | 1.10 (0.77–1.56) |
|                   |              |              | Log-additive                   | 0.72 | 1.06 (0.78–1.43) | 0.66  | 1.08 (0.78–1.48) |
| <b>rs1501299</b>  |              |              | Allele contrast (T vs. G)      | 0.53 | 1.07 (0.87–1.31) | 0.53  | 1.07 (0.87–1.31) |
| G                 | 535 (69.48%) | 755 (70.83%) | Codominant (GT vs. GG)         | 0.65 | 1.14 (0.87–1.50) | 0.21  | 1.30 (0.97–1.76) |
| T                 | 235 (30.52%) | 311 (29.17%) | Codominant (TT vs. GG)         |      | 1.04 (0.64–1.68) |       | 1.08 (0.65–1.81) |
| GG                | 184 (47.79%) | 270 (50.66%) | Dominant (GT + TT vs. GG)      | 0.39 | 1.12 (0.86–1.46) | 0.11  | 1.26 (0.95–1.68) |
| GT                | 167 (43.38%) | 215 (40.34%) | Recessive (TT vs. GG + GT)     | 0.93 | 0.98 (0.62–1.55) | 0.87  | 0.96 (0.59–1.57) |
| TT                | 34 (8.83%)   | 48 (9.00%)   | Over-dominant (GT vs. GG + TT) | 0.36 | 1.13 (0.87–1.48) | 0.084 | 1.29 (0.97–1.72) |
|                   |              |              | Log-additive                   | 0.54 | 1.07 (0.87–1.30) | 0.24  | 1.14 (0.92–1.41) |
| <b>rs2241767</b>  |              |              | Allele contrast (G vs. A)      | 0.84 | 1.03 (0.76–1.40) | 0.84  | 1.03 (0.76–1.40) |
| A                 | 689 (89.48%) | 957 (89.77%) | Codominant (AG vs. AA)         | 0.49 | 1.12 (0.80–1.56) | 0.63  | 1.12 (0.78–1.60) |
| G                 | 81 (10.52%)  | 109 (10.22%) | Codominant (GG vs. AA)         |      | 0.47 (0.09–2.34) |       | 0.55 (0.10–2.99) |
| AA                | 306 (79.48%) | 430 (80.67%) | Dominant (AG + GG vs. AA)      | 0.65 | 1.08 (0.78–1.50) | 0.65  | 1.09 (0.76–1.54) |
| AG                | 77 (20.00%)  | 97 (18.20%)  | Recessive (GG vs. AA + AG)     | 0.31 | 0.46 (0.09–2.28) | 0.45  | 0.54 (0.10–2.93) |
| GG                | 2 (0.52%)    | 6 (1.13%)    | Over-dominant (AG vs. AA + GG) | 0.49 | 1.12 (0.81–1.57) | 0.53  | 1.12 (0.79–1.61) |
|                   |              |              | Log-additive                   | 0.84 | 1.03 (0.76–1.40) | 0.79  | 1.05 (0.75–1.46) |
| <b>rs3821799</b>  |              |              | Allele contrast (T vs. C)      | 0.62 | 1.05 (0.87–1.26) | 0.62  | 1.05 (0.87–1.26) |
| C                 | 415 (53.90%) | 587 (55.07%) | Codominant (CT vs. CC)         | 0.69 | 1.14 (0.84–1.55) | 0.29  | 1.30 (0.93–1.80) |
| T                 | 355 (46.10%) | 479 (44.93%) | Codominant (TT vs. CC)         |      | 1.08 (0.74–1.56) |       | 1.21 (0.81–1.81) |
| CC                | 112 (29.09%) | 168 (31.52%) | Dominant (CT + TT vs. CC)      | 0.43 | 1.12 (0.84–1.49) | 0.13  | 1.27 (0.93–1.73) |
| CT                | 191 (49.61%) | 251 (47.09%) | Recessive (TT vs. CC + CT)     | 0.97 | 0.99 (0.72–1.37) | 0.85  | 1.03 (0.73–1.46) |

|                  |              |              |                                |      |                  |      |                  |
|------------------|--------------|--------------|--------------------------------|------|------------------|------|------------------|
| TT               | 82 (21.30%)  | 114 (21.39%) | Over-dominant (CT vs. CC + TT) | 0.45 | 1.11 (0.85–1.44) | 0.21 | 1.20 (0.90–1.59) |
|                  |              |              | Log-additive                   | 0.62 | 1.05 (0.87–1.26) | 0.28 | 1.12 (0.92–1.36) |
| <b>rs3774261</b> |              |              | Allele contrast (A vs. G)      | 0.48 | 1.07 (0.89–1.29) | 0.48 | 1.07 (0.89–1.29) |
| G                | 454 (58.96%) | 646 (60.60%) | Codominant (GA vs. GG)         | 0.61 | 1.16 (0.87–1.55) | 0.24 | 1.30 (0.95–1.78) |
| A                | 316 (41.04%) | 420 (39.40%) | Codominant (AA vs. GG)         |      | 1.10 (0.75–1.62) |      | 1.21 (0.80–1.84) |
| GG               | 134 (34.81%) | 202 (37.90%) | Dominant (GA + AA vs. GG)      | 0.34 | 1.14 (0.87–1.50) | 0.10 | 1.28 (0.95–1.72) |
| GA               | 186 (48.31%) | 242 (45.40%) | Recessive (AA vs. GG + GA)     | 0.94 | 1.01 (0.71–1.44) | 0.82 | 1.04 (0.72–1.52) |
| AA               | 65 (16.88%)  | 89 (16.70%)  | Over-dominant (GA vs. GG + AA) | 0.38 | 1.12 (0.86–1.46) | 0.16 | 1.23 (0.92–1.63) |
|                  |              |              | Log-additive                   | 0.49 | 1.07 (0.89–1.29) | 0.21 | 1.14 (0.93–1.39) |
| <b>rs1063539</b> |              |              | Allele contrast (C vs. G)      | 0.85 | 1.03 (0.77–1.38) | 0.85 | 1.03 (0.77–1.38) |
| G                | 684 (88.83%) | 950 (89.12%) | Codominant (GC vs. GG)         | 0.79 | 1.08 (0.78–1.49) | 0.93 | 1.06 (0.75–1.51) |
| C                | 86 (11.17%)  | 116 (10.88%) | Codominant (CC vs. GG)         |      | 0.70 (0.17–2.82) |      | 0.86 (0.20–3.74) |
| GG               | 302 (78.44%) | 423 (79.36%) | Dominant (GC + CC vs. GG)      | 0.74 | 1.06 (0.77–1.46) | 0.79 | 1.05 (0.74–1.48) |
| GC               | 80 (20.78%)  | 104 (19.51%) | Recessive (CC vs. GG + GC)     | 0.59 | 0.69 (0.17–2.78) | 0.83 | 0.85 (0.20–3.69) |
| CC               | 3 (0.78%)    | 6 (1.13%)    | Over-dominant (GC vs. GG + CC) | 0.64 | 1.08 (0.78–1.50) | 0.74 | 1.06 (0.75–1.51) |
|                  |              |              | Log-additive                   | 0.84 | 1.03 (0.76–1.39) | 0.84 | 1.03 (0.75–1.43) |

Allele and genotype counts are presented as absolute values with % in parentheses. <sup>a</sup>*P*, OR, and 95% CI values for genotype comparisons were adjusted for age, sex, *APOE* ε4 carrier status, hypertension, type 2 diabetes mellitus, and body mass index. *ADIPOQ*: adiponectin gene; *APOE*: apolipoprotein E gene; CI: confidence interval; LOAD: late-onset Alzheimer's disease; OR: odds ratio.
