# Supplementary material for: Adiponectin Gene Polymorphisms: A Case–Control Study on Their Role in Late-Onset Alzheimer’s Disease Risk
Source: MDPI journal article supplement (doi:10.3390/life14030346), 2024-03-07
Supplement: s1 [file s1]

**Supplementary Table S8.** Association between *ADIPOQ* polymorphisms and LOAD risk in female subjects.

| <i>ADIPOQ</i> SNPs | Females with LOAD<br>(n = 243) |        | Female Controls<br>(n = 320) |        | Logistic Regression Analysis<br>(Log-additive Model) |                  |
|--------------------|--------------------------------|--------|------------------------------|--------|------------------------------------------------------|------------------|
|                    | Genotypes <sup>a</sup>         | MAF    | Genotypes <sup>a</sup>       | MAF    | <i>p</i> -Value                                      | OR (95% CI)      |
| rs822387 T>C       | 213/27/3                       | 0.0679 | 279/38/3                     | 0.0688 | 0.80                                                 | 0.94 (0.58–1.53) |
| rs860291 C>T       | 185/54/4                       | 0.1276 | 244/74/2                     | 0.1219 | 0.81                                                 | 1.05 (0.71–1.55) |
| rs17300539 G>A     | 213/29/1                       | 0.0638 | 277/40/3                     | 0.0719 | 0.42                                                 | 0.81 (0.49–1.34) |
| rs266729 C>G       | 132/90/21                      | 0.2716 | 167/125/28                   | 0.2828 | 0.56                                                 | 0.92 (0.70–1.22) |
| rs182052 G>A       | 97/110/36                      | 0.3745 | 127/150/43                   | 0.3688 | 0.92                                                 | 0.99 (0.76–1.28) |
| rs822393 C>T       | 134/90/19                      | 0.2634 | 180/122/18                   | 0.2469 | 0.57                                                 | 1.09 (0.81–1.45) |
| rs822395 A>C       | 106/101/36                     | 0.3560 | 138/141/41                   | 0.3484 | 0.79                                                 | 0.97 (0.74–1.25) |
| rs822396 A>G       | 156/77/10                      | 0.1996 | 200/108/12                   | 0.2063 | 0.52                                                 | 0.90 (0.65–1.24) |
| rs7627128 C>A      | 170/67/6                       | 0.1626 | 221/88/11                    | 0.1719 | 0.57                                                 | 0.91 (0.65–1.27) |
| rs2036373 T>G      | 217/26/0                       | 0.0535 | 283/36/1                     | 0.0594 | 0.95                                                 | 0.98 (0.56–1.72) |
| rs17366568 G>A     | 195/46/2                       | 0.1029 | 250/67/3                     | 0.1141 | 0.31                                                 | 0.81 (0.53–1.22) |
| rs17846866 T>G     | 212/31/0                       | 0.0638 | 285/34/1                     | 0.0563 | 0.77                                                 | 1.09 (0.63–1.87) |
| rs2241766 T>G      | 193/46/4                       | 0.1111 | 256/59/5                     | 0.1078 | 0.57                                                 | 1.12 (0.75–1.67) |
| rs1501299 G>T      | 126/95/22                      | 0.2860 | 165/129/26                   | 0.2828 | 0.54                                                 | 1.09 (0.83–1.45) |
| rs2241767 A>G      | 193/48/2                       | 0.1070 | 257/58/5                     | 0.1063 | 0.67                                                 | 1.09 (0.73–1.65) |
| rs3821799 C>T      | 80/111/52                      | 0.4424 | 106/150/64                   | 0.4344 | 0.40                                                 | 1.11 (0.87–1.43) |
| rs3774261 G>A      | 91/112/40                      | 0.3951 | 124/143/53                   | 0.3891 | 0.38                                                 | 1.12 (0.87–1.45) |
| rs1063539 G>C      | 190/50/3                       | 0.1152 | 252/64/4                     | 0.1125 | 0.64                                                 | 1.10 (0.74–1.64) |

<sup>a</sup>Genotype counts are presented as follows: major allele homozygotes/heterozygotes/minor allele homozygotes. Logistic regression analysis was adjusted for age, *APOE* ε4 carrier status, hypertension, type 2 diabetes mellitus, and body mass index. *ADIPOQ*: adiponectin gene; *APOE*: apolipoprotein E gene; CI: confidence interval; LOAD: late-onset Alzheimer's disease; MAF: minor allele frequency; OR: odds ratio; SNP: single nucleotide polymorphism.
