# Supplementary material for: Adiponectin Gene Polymorphisms: A Case–Control Study on Their Role in Late-Onset Alzheimer’s Disease Risk
Source: MDPI journal article supplement (doi:10.3390/life14030346), 2024-03-07
Supplement: s1 [file s1]

**Supplementary Table S10.** Association between *ADIPOQ* polymorphisms and age of AD onset in LOAD patients.

| <i>ADIPOQ</i> SNPs | Age of Disease Onset (Years) <sup>a</sup> |              |               | Genetic Model | <i>p</i> <sub>adj</sub> -Value <sup>b</sup> | Δ (95% CI) <sup>b</sup> |
|--------------------|-------------------------------------------|--------------|---------------|---------------|---------------------------------------------|-------------------------|
|                    | 1/1                                       | 1/2          | 2/2           |               |                                             |                         |
| rs822387 T>C       | 75.26 ± 6.29                              | 73.91 ± 7.05 | 70.67 ± 6.03  | Log-additive  | 0.13                                        | -1.32 (-3.03 – 0.39)    |
| rs860291 C>T       | 74.80 ± 6.29                              | 75.95 ± 6.74 | 77.25 ± 7.04  | Log-additive  | 0.12                                        | 1.12 (-0.28 – 2.53)     |
| rs17300539 G>A     | 75.10 ± 6.33                              | 74.90 ± 6.89 | 70.00 ± 0.00  | Log-additive  | 0.80                                        | -0.24 (-2.04 – 1.56)    |
| rs266729 C>G       | 75.25 ± 6.57                              | 74.76 ± 6.37 | 75.28 ± 5.44  | Over-dominant | 0.75                                        | -0.21 (-1.50 – 1.08)    |
| rs182052 G>A       | 75.03 ± 6.95                              | 74.89 ± 6.02 | 75.66 ± 6.04  | Recessive     | 0.47                                        | 0.64 (-1.10 – 2.37)     |
| rs822393 C>T       | 74.93 ± 6.78                              | 75.09 ± 5.95 | 75.76 ± 5.72  | Recessive     | 0.50                                        | 0.77 (-1.46 – 3.00)     |
| rs822395 A>C       | 75.19 ± 5.96                              | 74.99 ± 6.74 | 74.85 ± 6.74  | Log-additive  | 0.91                                        | -0.05 (-0.97 – 0.87)    |
| rs822396 A>G       | 74.90 ± 6.36                              | 75.24 ± 6.65 | 76.50 ± 4.80  | Log-additive  | 0.28                                        | 0.63 (-0.50 – 1.76)     |
| rs7627128 C>A      | 75.22 ± 6.57                              | 74.70 ± 6.02 | 74.70 ± 5.81  | Log-additive  | 0.48                                        | -0.43 (-1.62 – 0.77)    |
| rs2036373 T>G      | 75.14 ± 6.30                              | 74.43 ± 7.19 | -             | -             | 0.36                                        | -0.93 (-2.94 – 1.07)    |
| rs17366568 G>A     | 75.33 ± 6.12                              | 74.03 ± 7.07 | 75.00 ± 11.66 | Over-dominant | 0.15                                        | -1.15 (-2.69 – 0.39)    |
| rs17846866 T>G     | 75.18 ± 6.27                              | 74.36 ± 7.08 | -             | -             | 0.41                                        | -0.74 (-2.51 – 1.03)    |
| rs2241766 T>G      | 74.99 ± 6.45                              | 75.23 ± 6.27 | 77.25 ± 5.06  | Recessive     | 0.58                                        | 1.75 (-4.41 – 7.92)     |
| rs1501299 G>T      | 75.19 ± 6.46                              | 74.71 ± 6.33 | 76.09 ± 6.38  | Over-dominant | 0.33                                        | -0.63 (-1.89 – 0.64)    |
| rs2241767 A>G      | 74.97 ± 6.48                              | 75.49 ± 6.14 | 73.00 ± 0.00  | Over-dominant | 0.52                                        | 0.51 (-1.05 – 2.07)     |
| rs3821799 C>T      | 74.57 ± 6.07                              | 75.42 ± 6.66 | 74.89 ± 6.21  | Over-dominant | 0.20                                        | 0.83 (-0.43 – 2.08)     |
| rs3774261 G>A      | 74.65 ± 6.49                              | 75.51 ± 6.44 | 74.63 ± 6.06  | Over-dominant | 0.20                                        | 0.82 (-0.43 – 2.07)     |
| rs1063539 G>C      | 74.83 ± 6.43                              | 75.88 ± 6.27 | 76.33 ± 5.77  | Log-additive  | 0.23                                        | 0.88 (-0.56 – 2.31)     |

<sup>a</sup>Age of onset is expressed as mean ± standard deviation. <sup>b</sup>Linear regression analysis was adjusted for sex, *APOE* ε4 carrier status, hypertension, type 2 diabetes mellitus, and body mass index. Difference (Δ) in age of onset, 95% CI and *p*-values are shown for the best genetic model with the lowest Akaike information (AIC). 1/1: major allele homozygotes; 1/2: heterozygotes; 2/2: minor allele homozygotes; *ADIPOQ*: adiponectin gene; *APOE*: apolipoprotein E gene; LOAD: late-onset Alzheimer's disease; SNP: single nucleotide polymorphism.
