# Supplementary material for: Adiponectin Gene Polymorphisms: A Case–Control Study on Their Role in Late-Onset Alzheimer’s Disease Risk
Source: MDPI journal article supplement (doi:10.3390/life14030346), 2024-03-07
Supplement: s1 [file s1]

**Supplementary Table S1.** Primer sequences and PCR-RFLP genotyping conditions for *ADIPOQ* SNPs.

| SNP        | Primer Sequence                                                                     | Ta   | Restriction Enzyme | Fragment Length (bp)            |
|------------|-------------------------------------------------------------------------------------|------|--------------------|---------------------------------|
| rs822387   | F: 5'-ACTGTGCCTGGCCTAGTGTT-3'<br>R: 5'-TGCCACAGTAGGAAGTGAA-3'                       | 54°C | XbaI               | T: 294 + 286<br>C: 582          |
| rs860291   | F: 5'-CCACCTTGTGCAATAGCTACGGC-3'<br>R: 5'-GGGCAACAGAGCGAGAATCCAT-3'                 | 60°C | BsuRI              | C: 81 + 22<br>T: 103            |
| rs17300539 | F: 5'-ACTTGCCCTGCCTCTGTCTG-3'<br>R: 5'-GCAAGTTAAAAAGGCCCTGA-3'                      | 58°C | MspI               | G: 396 + 121<br>A: 517          |
| rs266729   | F: 5'-ACTTGCCCTGCCTCTGTCTG-3'<br>R: 5'-GCAAGTTAAAAAGGCCCTGA-3'                      | 58°C | HhaI               | C: 517<br>G: 380 + 137          |
| rs182052   | F: 5'-TCTCCCGTCCGTAGTAGTGT-3'<br>R: 5'-TAGGTATCCTGCTACAGAGCCA-3'                    | 58°C | BglI               | G: 177 + 22<br>A: 199           |
| rs822393   | F: 5'-TTCCAAATCGGTGAGCTTTC-3'<br>R: 5'-AGGGCTTTGGGAAGATTAGG-3'                      | 52°C | Hinfi              | C: 137 + 65<br>T: 202           |
| rs822395   | F: 5'-TGATCGCACCTATTAGTGGAGGAAT-3'<br>R: 5'-TCCAGAAATATGTGAAAGCCCCAGAG-3'           | 58°C | Hinfi              | A: 208<br>C: 186 + 22           |
| rs822396   | F: 5'-CAGGCTGATCGCACCTATTA-3'<br>R: 5'-CATCCTTTTCTGCTGGGAAA-3'                      | 58°C | TruII              | A: 147 + 99<br>G: 246           |
| rs7627128  | F: 5'-GAGTTGGATGTGCCACGTGAAGAGGGTAGTATAGTA-3'<br>R: 5'-TGAGGGATGGAAGAAAGACCGTGAT-3' | 62°C | RsaI               | C: 94 + 35<br>A: 129            |
| rs2036373  | F: 5'-GAGAGACACATCATCCCGTG-3'<br>R: 5'-GGGTCCTGAAAGCTGAATAGAG-3'                    | 57°C | Alw44I             | T: 106<br>G: 84 + 22            |
| rs17366568 | F: 5'-CCAGGAGAGGGGTAGAGGAAG-3'<br>R: 5'-TAATTTTCCCATGTCTGAGCA-3'                    | 58°C | TruII              | G: 237<br>A: 124 + 113          |
| rs17846866 | F: 5'-GCTAAGTATTACAGATTTAGGGCAG-3'<br>R: 5'-CAGCCATGGAGAGACAGACCC-3'                | 60°C | Hinfi              | T: 107 + 55 + 19<br>G: 126 + 55 |
| rs2241766  | F: 5'-CTGAGATGGACGGAGTCCTTT-3'<br>R: 5'-CCAAATCACTTCAGGTTGCTT-3'                    | 60°C | SmaI               | T: 456<br>G: 316 + 140          |
| rs1501299  | F: 5'-CTGAGATGGACGGAGTCCTTT-3'<br>R: 5'-CCAAATCACTTCAGGTTGCTT-3'                    | 60°C | Mva1269I           | G: 374 + 82<br>T: 456           |
| rs2241767  | F: 5'-GGTGAGAAGGGTGAGAAAGGAG-3'<br>R: 5'-TACTGGGAATAGGGATGAGGG-3'                   | 60°C | Eco81I             | A: 292<br>G: 159 + 133          |
| rs3821799  | F: 5'-CCTTTCCCATCTTCACCCTCA-3'<br>R: 5'-TCATTCTTCATCAGGTCCACG-3'                    | 60°C | Eco91I             | C: 191 + 107<br>T: 298          |
| rs3774261  | F: 5'-TGGCATTCAACCACATTAC-3'<br>R: 5'-AAGCCTTCATTCTTCATCAG-3'                       | 52°C | RsaI               | G: 184 + 33<br>A: 217           |
| rs1063539  | F: 5'-TGGCTATGCTCACAGTCTCAC-3'<br>R: 5'-ACTTCAAAGCATCACAGGACC-3'                    | 60°C | Hinfi              | G: 119 + 79<br>C: 198           |

The underlined bases indicate artificial substitutions that were introduced to create restriction site for endonuclease. bp: base pair; F: forward; PCR: polymerase chain reaction; R: reverse; RFLP: restriction fragment length polymorphism; SNP: single nucleotide polymorphism; Ta: annealing temperature.
