# Supplementary material for: Adiponectin Gene Polymorphisms: A Case–Control Study on Their Role in Late-Onset Alzheimer’s Disease Risk
Source: MDPI journal article supplement (doi:10.3390/life14030346), 2024-03-07
Supplement: s1 [file s1]

**Supplementary Table S6.** Association between *ADIPOQ* polymorphisms and LOAD risk in the *APOE*  $\epsilon 4$ -positive subpopulation.

| <i>ADIPOQ</i> SNPs | <i>APOE</i> $\epsilon 4$ + LOAD<br>(n = 195) |        | <i>APOE</i> $\epsilon 4$ + Controls<br>(n = 101) |        | Logistic Regression Analysis<br>(Log-additive Model) |                  |
|--------------------|----------------------------------------------|--------|--------------------------------------------------|--------|------------------------------------------------------|------------------|
|                    | Genotypes <sup>a</sup>                       | MAF    | Genotypes <sup>a</sup>                           | MAF    | <i>p</i> -Value                                      | OR (95% CI)      |
| rs822387 T>C       | 167/25/3                                     | 0.0795 | 86/14/1                                          | 0.0792 | 0.92                                                 | 1.03 (0.56–1.90) |
| rs860291 C>T       | 151/42/2                                     | 0.1179 | 84/16/1                                          | 0.0891 | 0.24                                                 | 1.42 (0.79–2.55) |
| rs17300539 G>A     | 168/26/1                                     | 0.0718 | 84/15/2                                          | 0.0941 | 0.34                                                 | 0.75 (0.41–1.36) |
| rs266729 C>G       | 98/83/14                                     | 0.2846 | 50/43/8                                          | 0.2921 | 0.90                                                 | 0.98 (0.66–1.43) |
| rs182052 G>A       | 72/95/28                                     | 0.3872 | 38/49/14                                         | 0.3812 | 0.91                                                 | 1.02 (0.72–1.46) |
| rs822393 C>T       | 112/67/16                                    | 0.2538 | 59/36/6                                          | 0.2376 | 0.72                                                 | 1.07 (0.73–1.57) |
| rs822395 A>C       | 79/87/29                                     | 0.3718 | 47/40/14                                         | 0.3366 | 0.41                                                 | 1.16 (0.82–1.64) |
| rs822396 A>G       | 123/64/8                                     | 0.2051 | 68/28/5                                          | 0.1881 | 0.60                                                 | 1.12 (0.73–1.72) |
| rs7627128 C>A      | 135/56/4                                     | 0.1641 | 71/26/4                                          | 0.1683 | 0.96                                                 | 0.99 (0.62–1.56) |
| rs2036373 T>G      | 177/18/0                                     | 0.0462 | 92/9/0                                           | 0.0446 | 0.98                                                 | 1.01 (0.43–2.36) |
| rs17366568 G>A     | 151/42/2                                     | 0.1179 | 81/19/1                                          | 0.1040 | 0.59                                                 | 1.17 (0.67–2.05) |
| rs17846866 T>G     | 167/28/0                                     | 0.0718 | 91/10/0                                          | 0.0495 | 0.33                                                 | 1.46 (0.67–3.15) |
| rs2241766 T>G      | 155/38/2                                     | 0.1077 | 84/16/1                                          | 0.0891 | 0.47                                                 | 1.24 (0.69–2.23) |
| rs1501299 G>T      | 100/80/15                                    | 0.2821 | 52/38/11                                         | 0.2970 | 0.76                                                 | 0.94 (0.65–1.37) |
| rs2241767 A>G      | 156/38/1                                     | 0.1026 | 84/16/1                                          | 0.0891 | 0.62                                                 | 1.16 (0.64–2.11) |
| rs3821799 C>T      | 62/96/37                                     | 0.4359 | 37/41/23                                         | 0.4307 | 0.93                                                 | 1.02 (0.73–1.42) |
| rs3774261 G>A      | 75/90/30                                     | 0.3846 | 41/42/18                                         | 0.3861 | 0.99                                                 | 1.00 (0.71–1.41) |
| rs1063539 G>C      | 155/39/1                                     | 0.1051 | 82/18/1                                          | 0.0990 | 0.89                                                 | 1.04 (0.58–1.87) |

<sup>a</sup>Genotype counts are presented as follows: major allele homozygotes/heterozygotes/minor allele homozygotes. Logistic regression analysis was adjusted for age, sex, hypertension, type 2 diabetes mellitus, and body mass index. *ADIPOQ*: adiponectin gene; *APOE*: apolipoprotein E gene; CI: confidence interval; LOAD: late-onset Alzheimer's disease; MAF: minor allele frequency; OR: odds ratio; SNP: single nucleotide polymorphism.
