# Supplementary material for: Adiponectin Gene Polymorphisms: A Case–Control Study on Their Role in Late-Onset Alzheimer’s Disease Risk
Source: MDPI journal article supplement (doi:10.3390/life14030346), 2024-03-07
Supplement: s1 [file s1]

**Supplementary Table S9.** Association between *ADIPOQ* polymorphisms and LOAD risk in male subjects.

| <i>ADIPOQ</i> SNPs | Males with LOAD<br>(n = 142) |        | Male Controls<br>(n = 213) |        | Logistic Regression Analysis<br>(Log-additive Model) |                  |
|--------------------|------------------------------|--------|----------------------------|--------|------------------------------------------------------|------------------|
|                    | Genotypes <sup>a</sup>       | MAF    | Genotypes <sup>a</sup>     | MAF    | <i>p</i> -Value                                      | OR (95% CI)      |
| rs822387 T>C       | 123/19/0                     | 0.0669 | 184/27/2                   | 0.0728 | 0.66                                                 | 0.87 (0.46–1.62) |
| rs860291 C>T       | 116/26/0                     | 0.0915 | 181/31/1                   | 0.0775 | 0.46                                                 | 1.25 (0.70–2.24) |
| rs17300539 G>A     | 122/20/0                     | 0.0704 | 180/30/3                   | 0.0845 | 0.53                                                 | 0.83 (0.45–1.50) |
| rs266729 C>G       | 74/57/11                     | 0.2782 | 112/86/15                  | 0.2723 | 0.97                                                 | 1.01 (0.70–1.44) |
| rs182052 G>A       | 54/65/23                     | 0.3908 | 85/102/26                  | 0.3615 | 0.47                                                 | 1.13 (0.81–1.57) |
| rs822393 C>T       | 79/49/14                     | 0.2711 | 116/83/14                  | 0.2606 | 0.46                                                 | 1.14 (0.80–1.63) |
| rs822395 A>C       | 64/66/12                     | 0.3169 | 102/88/23                  | 0.3146 | 0.99                                                 | 1.00 (0.71–1.41) |
| rs822396 A>G       | 100/38/4                     | 0.1620 | 158/51/4                   | 0.1385 | 0.63                                                 | 1.12 (0.71–1.74) |
| rs7627128 C>A      | 99/39/4                      | 0.1655 | 142/65/6                   | 0.1808 | 0.87                                                 | 0.96 (0.63–1.48) |
| rs2036373 T>G      | 126/16/0                     | 0.0563 | 192/21/0                   | 0.0493 | 0.36                                                 | 1.41 (0.68–2.94) |
| rs17366568 G>A     | 107/33/2                     | 0.1303 | 151/60/2                   | 0.1502 | 0.96                                                 | 0.99 (0.61–1.61) |
| rs17846866 T>G     | 117/25/0                     | 0.0880 | 179/33/1                   | 0.0822 | 0.53                                                 | 1.21 (0.67–2.19) |
| rs2241766 T>G      | 111/31/0                     | 0.1092 | 171/41/1                   | 0.1009 | 0.97                                                 | 1.01 (0.58–1.74) |
| rs1501299 G>T      | 58/72/12                     | 0.3380 | 105/86/22                  | 0.3052 | 0.27                                                 | 1.21 (0.86–1.71) |
| rs2241767 A>G      | 113/29/0                     | 0.1021 | 173/39/1                   | 0.0962 | 0.95                                                 | 0.98 (0.56–1.72) |
| rs3821799 C>T      | 32/80/30                     | 0.4930 | 62/101/50                  | 0.4718 | 0.49                                                 | 1.12 (0.81–1.55) |
| rs3774261 G>A      | 43/74/25                     | 0.4366 | 78/99/36                   | 0.4014 | 0.35                                                 | 1.17 (0.84–1.61) |
| rs1063539 G>C      | 112/30/0                     | 0.1056 | 171/40/2                   | 0.1033 | 0.82                                                 | 0.94 (0.54–1.62) |

<sup>a</sup>Genotype counts are presented as follows: major allele homozygotes/heterozygotes/minor allele homozygotes. Logistic regression analysis was adjusted for age, *APOE* ε4 carrier status, hypertension, type 2 diabetes mellitus, and body mass index. *ADIPOQ*: adiponectin gene; *APOE*: apolipoprotein E gene; CI: confidence interval; LOAD: late-onset Alzheimer's disease; MAF: minor allele frequency; OR: odds ratio; SNP: single nucleotide polymorphism.
