# Supplementary material for: Adiponectin Gene Polymorphisms: A Case–Control Study on Their Role in Late-Onset Alzheimer’s Disease Risk
Source: MDPI journal article supplement (doi:10.3390/life14030346), 2024-03-07
Supplement: s1 [file s1]

**Supplementary Table S3.** Linkage disequilibrium data ( $D'$ ,  $r^2$ ) of the *ADIPOQ* SNPs observed in the overall study population.

|            | rs822387 | rs860291 | rs17300539 | rs266729 | rs182052 | rs822393 | rs822395 | rs822396 | rs7627128 | rs2036373 | rs17366568 | rs17846866 | rs2241766 | rs1501299 | rs2241767 | rs3821799 | rs3774261 | rs1063539 |
|------------|----------|----------|------------|----------|----------|----------|----------|----------|-----------|-----------|------------|------------|-----------|-----------|-----------|-----------|-----------|-----------|
| rs822387   | -        | 1.0      | 0.838      | 1.0      | 1.0      | 1.0      | 0.969    | 1.0      | 1.0       | 0.675     | 0.266      | 1.0        | 0.031     | 0.609     | 0.03      | 0.702     | 0.768     | 0.007     |
| rs860291   | 0.009    | -        | 1.0        | 1.0      | 1.0      | 1.0      | 0.97     | 0.98     | 1.0       | 0.587     | 1.0        | 1.0        | 1.0       | 0.954     | 1.0       | 0.959     | 0.974     | 1.0       |
| rs17300539 | 0.668    | 0.01     | -          | 1.0      | 1.0      | 1.0      | 0.97     | 1.0      | 1.0       | 1.0       | 1.0        | 1.0        | 0.027     | 0.795     | 0.036     | 0.937     | 0.964     | 0.021     |
| rs266729   | 0.029    | 0.047    | 0.03       | -        | 1.0      | 0.418    | 0.135    | 0.194    | 0.869     | 0.884     | 0.241      | 0.059      | 0.641     | 0.763     | 0.625     | 0.634     | 0.713     | 0.517     |
| rs182052   | 0.044    | 0.072    | 0.047      | 0.646    | -        | 0.903    | 0.052    | 0.075    | 0.858     | 0.867     | 0.33       | 0.006      | 0.519     | 0.419     | 0.48      | 0.372     | 0.435     | 0.426     |
| rs822393   | 0.026    | 0.042    | 0.027      | 0.159    | 0.48     | -        | 0.98     | 1.0      | 0.981     | 1.0       | 0.287      | 0.019      | 0.411     | 0.227     | 0.343     | 0.276     | 0.259     | 0.405     |
| rs822395   | 0.138    | 0.224    | 0.145      | 0.014    | 0.001    | 0.17     | -        | 0.995    | 1.0       | 0.851     | 0.251      | 0.583      | 0.445     | 0.186     | 0.439     | 0.077     | 0.25      | 0.374     |
| rs822396   | 0.017    | 0.525    | 0.018      | 0.022    | 0.002    | 0.077    | 0.431    | -        | 1.0       | 0.784     | 0.929      | 0.869      | 0.867     | 0.734     | 0.876     | 0.791     | 0.778     | 0.704     |
| rs7627128  | 0.015    | 0.025    | 0.016      | 0.406    | 0.255    | 0.568    | 0.105    | 0.046    | -         | 1.0       | 0.221      | 0.18       | 0.605     | 0.749     | 0.566     | 0.693     | 0.677     | 0.595     |
| rs2036373  | 0.002    | 0.002    | 0.005      | 0.017    | 0.026    | 0.02     | 0.022    | 0.008    | 0.012     | -         | 1.0        | 1.0        | 0.768     | 0.926     | 0.782     | 0.939     | 0.924     | 0.78      |
| rs17366568 | 0.001    | 0.017    | 0.011      | 0.021    | 0.025    | 0.033    | 0.017    | 0.027    | 0.033     | 0.008     | -          | 0.981      | 1.0       | 0.683     | 1.0       | 0.199     | 0.69      | 1.0       |
| rs17846866 | 0.006    | 0.009    | 0.006      | 0.0      | 0.0      | 0.0      | 0.05     | 0.012    | 0.0       | 0.004     | 0.517      | -          | 0.863     | 0.496     | 0.795     | 0.953     | 0.485     | 0.817     |
| rs2241766  | 0.001    | 0.015    | 0.0        | 0.019    | 0.019    | 0.007    | 0.012    | 0.02     | 0.009     | 0.004     | 0.017      | 0.007      | -         | 1.0       | 0.988     | 0.889     | 0.917     | 0.954     |
| rs1501299  | 0.066    | 0.047    | 0.118      | 0.094    | 0.044    | 0.008    | 0.007    | 0.051    | 0.049     | 0.118     | 0.027      | 0.008      | 0.051     | -         | 1.0       | 0.992     | 0.997     | 0.949     |
| rs2241767  | 0.001    | 0.014    | 0.001      | 0.017    | 0.016    | 0.005    | 0.011    | 0.02     | 0.008     | 0.004     | 0.016      | 0.005      | 0.938     | 0.049     | -         | 0.985     | 1.0       | 0.976     |
| rs3821799  | 0.044    | 0.093    | 0.083      | 0.128    | 0.068    | 0.022    | 0.003    | 0.116    | 0.082     | 0.062     | 0.007      | 0.081      | 0.114     | 0.5       | 0.135     | -         | 0.992     | 0.891     |
| rs3774261  | 0.066    | 0.077    | 0.109      | 0.13     | 0.075    | 0.016    | 0.021    | 0.09     | 0.063     | 0.074     | 0.044      | 0.012      | 0.151     | 0.628     | 0.173     | 0.791     | -         | 0.896     |
| rs1063539  | 0.0      | 0.015    | 0.0        | 0.013    | 0.013    | 0.007    | 0.009    | 0.014    | 0.009     | 0.004     | 0.017      | 0.006      | 0.885     | 0.047     | 0.89      | 0.118     | 0.148     | -         |

Pairwise linkage disequilibrium  $D'$ -values are shown above the diagonal in the upper right triangle,  $r^2$ -values are shown below the diagonal in the lower left triangle. *ADIPOQ*: adiponectin gene; SNP: single nucleotide polymorphism.
